# Supplementary material for: Nutritional and Non-Nutritional Strategies in Bodybuilding: Impact on Kidney Function
Source: MDPI journal article supplement (doi:10.3390/ijerph19074288), 2022-04-03
Supplement: s1 [file s1]

| Study                                                      | Protein                                                                                                                                | Creatine                                                         | Anabolic steroids                                                                                                                                     | Vitamins      | NSAIDS        | Diuretics/laxatives | Other                                   |
|------------------------------------------------------------|----------------------------------------------------------------------------------------------------------------------------------------|------------------------------------------------------------------|-------------------------------------------------------------------------------------------------------------------------------------------------------|---------------|---------------|---------------------|-----------------------------------------|
| (Thorsteinsdottir, Grande, & Garovic, 2006)                | Not specified<br>Amino acid supplements                                                                                                | 5g- x3/week for 6 months                                         | Denied                                                                                                                                                | Yes           | Denied        | Denied              | multiple herbs & non-herbal supplements |
| (Taner, Aysim, & Abdulkadir, 2011)                         | Not specified                                                                                                                          | Loading = 20g/day for 5 days<br>Maintenance = 1g/day for 6 weeks | Not specified                                                                                                                                         | Not specified | Not specified | Not specified       | Not specified                           |
| (Ardalan, Samadifar, & Vahedi, 2012)                       | Not specified                                                                                                                          | Loading = 20g/day for 3 days<br>Maintenance = 1g/day for 3 weeks | Not specified                                                                                                                                         | Not specified | Not specified | Not specified       | Not specified                           |
| (Almukhtar, Abbas, Muhealdeen, & Hughson, 2015)            | 3.2–4.2 g/kg/day of protein: 78–104 g of whey powder + 2-3L/day milk                                                                   | 15g/day – 5g maintenance, 5g pre and 5g post workout             | Testosterone propionate +/- or nandrolone deconate IM >400mg weekly                                                                                   | Not specified | Not specified | Not specified       | Not specified                           |
| (Hartung, Gerth, Fünfstück, Gröne, & Stein, 2001)          | High protein diet – 2g/kg/day                                                                                                          | Creatine -210g/day                                               | testosterone -750–1000 mg/week<br>6 week intervals over 18 months                                                                                     | Not specified | Denied        | Denied              | Not specified                           |
| (Herlitz et al., 2010)                                     | Yes – 8/10<br>550 g/d protein<br>300-400g/day<br>500g/day<br>300g/day<br><br>Mean body weight – 107Kg<br>Mean protein- 2.8-5.1g/Kg/day | Yes – dose not specified                                         | Combinations of - testosterone, prohormone, durabolin, stanazolol, sustanon, primobolan, equipoise, and winstrol<br>Specific quantities not specified | Not specified | Not specified | Not specified       | Not specified                           |
| (El-resheid, El-resheid, Al-bader, Ramadan, & Madda, 2018) | high-protein diet (20–30 g/kg/day)                                                                                                     | Not specified                                                    | Testosterone ~250mg/day, Growth hormone (up to ~100mg/day)                                                                                            | Not specified | Not specified | Not specified       | Not specified                           |
| (Akl & Aldabbagh, 2019)                                    | high protein diet – not specified                                                                                                      | Yes – not specified                                              | Positive history - Not specified                                                                                                                      | Not specified | Not specified | Not specified       | Energy drinks for rehydration           |

|                                                          |                           |                           |                                                                                  |                                                                                                                         |               |               |                                                            |
|----------------------------------------------------------|---------------------------|---------------------------|----------------------------------------------------------------------------------|-------------------------------------------------------------------------------------------------------------------------|---------------|---------------|------------------------------------------------------------|
| (Ali et al., 2020)                                       | Yes – 14/15 not specified | Yes – 13/15 not specified | Yes – 12/15 not specified                                                        | Yes – 13/15<br>Oral intake Vit D – 11/15<br>Injection Vit D – 2/15                                                      | Not specified | Not specified | Not specified                                              |
| (Rocha, Santos, Avila, Neves, & Bahiense-Oliveira, 2011) | Not specified             | Not specified             | Denied                                                                           | 300mL over the previous year<br>Per 100ml:<br>Vit A- 20,000,000IU<br>Vit D3- 5,000,000IU<br>Vit E- 6,800IU              | Denied        | Denied        | several over- the-counter food supplements – not specified |
| (Ronsoni et al., 2017)                                   | Not specified             | Not specified             | Postive history of growth hormone, nandrolone and other testosterone derivatives | 150ml over the last 4 months<br>Vit A- 20,000,000IU<br>Vit D3- 5,000,000IU<br>Vit E- 6,800IU                            | Not specified | Not specified | Not specified                                              |
| (Libório, Nasseralla, Gondim, & Daher, 2014)             | Not specified             | Not specified             | Not specified                                                                    | 1 x 50mL /month over 2years<br>cholecalciferol- 50,000IU of vitamin D per mL                                            | Not specified | Not specified | Not specified                                              |
| (De Francesco Daher et al., 2017)                        | Not specified             | Not specified             | Positive history of AAS (n=6)<br>Quantity- not specified                         | positive history<br>Vit A- 20,000,000IU<br>Vit D- 35,000,000IU<br>Vit E- 6,000IU<br>Per 100ml<br>Quantity not specified | Not specified | Not specified | Not specified                                              |
