# Supplementary material for: Nutritional and Non-Nutritional Strategies in Bodybuilding: Impact on Kidney Function
Source: MDPI journal article supplement (doi:10.3390/ijerph19074288), 2022-04-03
Supplement: s1 [file s1]

| Study                                           | Participants               | History of Kidney disease |                                                            |                                                                                                                                                                |                                                                                                                                                                                                                 | Renal Biopsy results                                                                                                                                                                                                                                                                                                                                                                                                                                                                  | Treatment                                                                                                                            | Diagnosis                    | AKI/CKD/ESRD |
|-------------------------------------------------|----------------------------|---------------------------|------------------------------------------------------------|----------------------------------------------------------------------------------------------------------------------------------------------------------------|-----------------------------------------------------------------------------------------------------------------------------------------------------------------------------------------------------------------|---------------------------------------------------------------------------------------------------------------------------------------------------------------------------------------------------------------------------------------------------------------------------------------------------------------------------------------------------------------------------------------------------------------------------------------------------------------------------------------|--------------------------------------------------------------------------------------------------------------------------------------|------------------------------|--------------|
| (Thorsteinsdottir, Grande, & Garovic, 2006)     | 24-year-old male           | No                        | acute abdominal pain, polydipsia, polyuria                 | mg/24 hrs), hypertension (152/100 mm Hg), creatinine level (3.8 mg/dL), creatinine clearance (30 mL/min/24hrs), blood urea nitrogen (30 mg/dL)                 | Initial change: increased to 4.7 mg/dL<br>Time to decrease: 5 days<br>Final sCr: 2.5 mg/dL                                                                                                                      | 12 normal glomeruli were identified where tubules were separated because of interstitial edema. Focal interstitial inflammatory infiltrates; lymphocytes + eosinophils identified.                                                                                                                                                                                                                                                                                                    | all supplements discontinued                                                                                                         | acute interstitial nephritis |              |
| (Taner, Aysim, & Abdulkadir, 2011)              | 18-year-old male           | No                        | nausea, vomiting and stomach-ache over the previous 2 days | Signs and symptoms at presentation                                                                                                                             | Initial measures                                                                                                                                                                                                | Serum Creatine levels (initial increase, final and time to decrease)                                                                                                                                                                                                                                                                                                                                                                                                                  | all supplements discontinued and intravenous fluids                                                                                  | acute tubular necrosis       |              |
| (Ardalan, Samadifar, & Vahedi, 2012)            | 32-year-old male           | No                        | 2 weeks history of nausea and weakness                     | Hypertension (160/100 mmHg), sCr (4.3 mg/dL), serum urea (111 mg/dL), proteinuria and protein excretion clearance of 850 mg/24hrs                              | Initial change: 6.2 mg/dL<br>Time to decrease: Not specified<br>Final sCr: 1.8 mg/dL                                                                                                                            | normal glomeruli with mononuclear interstitial infiltrations and focal tubular disappearance plus few sloughed epithelial cells, and cellular debris in the tubular lumina                                                                                                                                                                                                                                                                                                            | all supplements discontinued, Methylprednisolon pulse therapy (500 mg/day for 2 days) followed by 6 weeks of Prednisolon (60 mg/day) | Acute interstitial nephritis |              |
| (Almukhtar, Abbas, Muhealdeem, & Hughson, 2015) | 4 male BB (20-26years-old) | No                        | weakness and lethargy                                      | Serum creatinine levels (229.84-335.92 µmol/L) or (2.6–3.8 mg/dL), eGFR (0.37-0.57 mL/s) or (22–34 mL/min) (Modification of Diet in Renal Disease calculation) | Initial change: Not specified<br>Time to decrease: 4 weeks and 6 months<br>Final sCr: At 4 wks- <123.76 µmol/L (1.4 mg/dL)<br>At 6 months- 118.92, 88.40, 97.24 and 106.08 µmol/L (1.3, 1.0, 1.1 and 1.2 mg/dL) | Renal biopsies contained 12 to 16 glomeruli, and all biopsies revealed foci of flattened tubular epithelium with loss of nuclei and epithelial desquamation and blebbing. Hematoxylin staining amorphous deposits and occasional dense concretions were present within the injured tubules and adjacent interstitium. Patients 1 and 4 demonstrated interstitial fibrosis and tubular atrophy (IF/TA) involving 30–40% of the cortex. Patient 2, IF/TA involved 10–15% of the cortex. | all supplements discontinued                                                                                                         | acute tubular necrosis       |              |

|                                                           |                            |               |                                                                                                                      |                                                                                                                                                            |                 |                                                                                                    |                                                                                                                                                           |                                                                                                                                                                                                                                                                                                                                |  |
|-----------------------------------------------------------|----------------------------|---------------|----------------------------------------------------------------------------------------------------------------------|------------------------------------------------------------------------------------------------------------------------------------------------------------|-----------------|----------------------------------------------------------------------------------------------------|-----------------------------------------------------------------------------------------------------------------------------------------------------------|--------------------------------------------------------------------------------------------------------------------------------------------------------------------------------------------------------------------------------------------------------------------------------------------------------------------------------|--|
| (Hartung, Gerth, Fünfstück, Gröne, & Stein, 2001)         | 27-year-old active BB      | No            | Periods of dizziness, fatigue, and vision loss over the previous 3months                                             | Hypertension (190/110mmHg), sCr (1030 µmol/l), sCr clearance (10.2ml/min/1.73m <sup>2</sup> ), s-urea (31.6 mmol/l), protein excretion rate (4532 mg/l)    | Not specified?? | nephrosclerosis plus augmented global glomerulosclerosis and dispersed chronic tubulo-interstitial | haemodialysis treatment 3times/week                                                                                                                       | FSGS                                                                                                                                                                                                                                                                                                                           |  |
| (Herlitz et al., 2010)                                    | 10 male BB (28 - 49 years) | No            | 6 out of 10 = systemic hypertension, 3 had a history of hypertension, all ranging 3months-5 years. 2 had sleep apnea | proteinuria (mean 10.1 g/d), mean sCr (3.0 mg/dl), sCr (1.4.7.8mg/dl), 24hrs-urine creatinine clearance (2.80-3.95 ml/min), 24-h protein (1.3 to 26.3 g/d) | Not specified?? | Not specified??                                                                                    | renin-angiotensin system blockade treatments (n=7), corticosteroids (n=1)                                                                                 | FSGS (n=9)<br>Glomerulomegaly (n=1)                                                                                                                                                                                                                                                                                            |  |
| (El-reshaid, El-reshaid, Al-bader, Ramadan, & Mada, 2018) | 22 male BB (29 ± 7 years)  | No            | Not specified                                                                                                        | impaired renal function or proteinuria and/or hematuria - Not specified                                                                                    | Not specified?? | Not specified??                                                                                    | low-protein (0.4 g/kg/day/) diet, discontinue AAS, GH and (NSAIDs) use.<br>Treatments = angiotensin-converting enzyme or angiotensin-receptor antagonists | FSGS (n=8)<br>Nephroangiosclerosis (n=4)<br>Interstitial nephritis (n=7)<br>Also - chronic interstitial nephritis (n=3), acute interstitial nephritis (n=2), nephrocalcinosis with chronic interstitial nephritis (n=2), membranous glomerulopathy (n=1), crescentic glomerulopathy (n=1), sclerosing glomerulonephritis (n=1) |  |
| (Akl & Aldabbagh, 2019)                                   | 26-year-old male BB        | Not specified | referred due to blood donation unknowingly indicated low haemoglobin level                                           | HB (8 g/dl), sCr (12 mg/dl), BUN (118 mg/dl)                                                                                                               | Not specified   | FSGS - severe renal cortical damage, glomerulosclerosis percentage was 100%                        | Intravenous fluids (partial improvement) and oral steroids (no response), initiated regular                                                               | FSGS                                                                                                                                                                                                                                                                                                                           |  |

|                                                          |                             |               |                                                  |                                                                                                                                                                                                                                              |                                                                                                |                                                   |                                                                                                                                                                                                                                 |                                                                                                                                                                                                                      |  |
|----------------------------------------------------------|-----------------------------|---------------|--------------------------------------------------|----------------------------------------------------------------------------------------------------------------------------------------------------------------------------------------------------------------------------------------------|------------------------------------------------------------------------------------------------|---------------------------------------------------|---------------------------------------------------------------------------------------------------------------------------------------------------------------------------------------------------------------------------------|----------------------------------------------------------------------------------------------------------------------------------------------------------------------------------------------------------------------|--|
|                                                          |                             |               |                                                  |                                                                                                                                                                                                                                              |                                                                                                |                                                   | haemodialysis and kidney transplantation organised                                                                                                                                                                              |                                                                                                                                                                                                                      |  |
| (Ali et al., 2020)                                       | 15 male BB (19-49years old) | Not specified | Not specified                                    | elevated serum creatinine and/or proteinuria                                                                                                                                                                                                 | Initial sCr – 1.3-8.6 mg/dL<br>sCr after 1 year- 1.0-3.4 mg/dL (2 patients progressed to ESRD) | interstitial fibrosis and tubular atrophy – 0-70% | ATN- IV fluids and supplementation discontinuation<br>TIN - supplementation discontinuation<br>FSGS – Transplantation<br>PIGN and MGN – not specified<br>Nephrocalcinosis – transplantation and supplementation discontinuation | Acute tubular necrosis – 7/15<br>FSGS -2/15<br>MGN (membranous glomerulonephritis)- 2/15<br>Nephrocalcinosis - 2/15<br>TIN (tubulointerstitial nephritis) – 1/15<br>PIGN (post-infectious glomerulonephritis) – 1/15 |  |
| (Rocha, Santos, Avila, Neves, & Bahiense-Oliveira, 2011) | 19-year-old BB              | No            | Anorexia, nausea, vomiting                       | Admission total serum calcium (13.6 mg/dL day 0), peak total serum calcium (14.8 mg/dL day 3), admission sCr (2.64mg/dL day 0), peak sCr (2.88 mg/dL day 2), outpatient sCr was 0.7 mg/dL three years ago, 25(OH) D level (150 ng/mL= toxic) | Initial change: Not specified<br>Time to decrease: 8 days<br>Final sCr: 1.09mg/dL              | Not done                                          | intense hydration and intravenous furosemide                                                                                                                                                                                    | Hypercalcaemia and AKI secondary to vitamin D intoxication, At follow-up complete renal recovery                                                                                                                     |  |
| (Ronsoni et al., 2017)                                   | 24-year-old BB              | No            | pain, nausea, fatigue, and vomiting for 2 months | sCr (3.1mg/dl), 25-OH-vitamin D (>150 ng/ml), total calcium (13.6 mg/dl)                                                                                                                                                                     | Initial change: Not specified<br>Time to decrease: 14 days<br>Final sCr:                       | Not done                                          | intense hydration, furosemide and prednisone                                                                                                                                                                                    | hypercalcemia and ARF (acute renal failure) secondary to vitamin intoxication – check-up showed normal laboratory results plus increased 25-OH- vitamin D of 107 ng/mL                                               |  |

|                                              |                             |    |                                                               |                                                                                                                                                          |                                                                                                                                                                                                 |                                                                                                       |                                                                                                                                                                             |                                                                                                                                                      |  |
|----------------------------------------------|-----------------------------|----|---------------------------------------------------------------|----------------------------------------------------------------------------------------------------------------------------------------------------------|-------------------------------------------------------------------------------------------------------------------------------------------------------------------------------------------------|-------------------------------------------------------------------------------------------------------|-----------------------------------------------------------------------------------------------------------------------------------------------------------------------------|------------------------------------------------------------------------------------------------------------------------------------------------------|--|
| (Libório, Nasseralla, Gondim, & Daher, 2014) | 22-year-old BB              | No | nausea, vomiting, and upper abdominal pain in the past 5 days | lipase levels (218U/l), haemoglobin levels (7.8g/dl), sCr (8.6mg/dl), serum calcium (13.8mg/dl)                                                          | 4 days post haemodialysis and prednisone = reduction in serum calcium, Two weeks after acute pancreatitis recovery = normalisation of serum calcium while serum creatinine of 1.8mg/dl remained | moderate interstitial fibrosis and tubular atrophy surrounding numerous interstitial calcium deposits | intense hydration and intravenous furosemide - no reduction in serum calcium levels and as renal failure and hypercalcaemia persisted, haemodialysis and prednisone         | CKD- Nephrocalcinosis                                                                                                                                |  |
| (Daher et al., 2017)                         | 16 males (28.3 ± 8.9 years) | No | headaches, nausea, vomiting and abdominal pain                | sCr (3.9±5.2mg/dl), serum calcium (12 ±2.2mg/dl), Peak serum calcium (mean; 13 ± 2.2 mg/dL, ranging 10.2 to 16.8 mg/dL), serum vitamin D (135±75 ng/ml), | Peak sCr (mean; 4.3 ± 5.2 mg/dL, ranging 0.8 to 8.6 mg/dL),                                                                                                                                     | Not specified                                                                                         | intense hydration, steroids, and loop diuretics, 2 cases of severe AKI – dialysis, 2 cases required haemodialysis Mean length of hospitalization - 15 ± 13 days (1–52 days) | 3 cases of nephrocalcinosis, 7 revealed nephrolithiasis, resulted in 13/16 cases deemed as AKI secondary to hypercalcaemia, 1 case progressed to CKD |  |
